# Supplementary material for: Mesoporous nanowire array architecture of manganese dioxide for electrochemical capacitor applications
Source: Royal Society of Chemistry journal article supplement (doi:10.1039/b915016a), 2009-01-01
Supplement: b915016a.pdf [file b915016a.pdf]

# Mesoporous Nanowire Array Architecture of Manganese Dioxide for Electrochemical Capacitor Applications

Cailing Xu,<sup>\*a,b</sup> Yongqing Zhao<sup>b</sup>, Guangwu Yang<sup>b</sup>, Fashen Li<sup>a</sup> and Hulin Li<sup>b</sup>

<sup>a</sup> Institute of Applied Magnetics, Key Laboratory of Magnetism and Magnetic Materials of Ministry of Education, School of Physical Science and Technology, Lanzhou University, Lanzhou, Gansu, 730000

<sup>b</sup> Key Laboratory of Nonferrous Metal Chemistry and Resources Utilization of Gansu Province, School of Chemistry and Chemical Engineering, Lanzhou University, Lanzhou, Gansu, 730000

## Experimental procedures

All chemical reagents were AnalaR grade and used as received without further purification. Nonionic surfactant polyoxyethylene (10) cetyl ether (Brij 56, C<sub>16</sub>EO<sub>10</sub>) was purchased from Aldrich. The manganese acetate (MnAc<sub>2</sub>·4H<sub>2</sub>O), potassium acetate (KAc), sodium sulfate (Na<sub>2</sub>SO<sub>4</sub>) and ethanol (99.9 %) were obtained from Shanghai Chemical Reagent Co. All aqueous solutions were prepared using high purity water (18 MΩ cm resistances).

AAO/Ti/Si substrates were prepared according to our previous reports<sup>1</sup>. The electrolyte was a binary system of 60 wt% surfactant Brij 56 and 40 wt% aqueous solution containing MnAc<sub>2</sub> (0.5 mol L<sup>-1</sup>) and KAc (0.51 mol L<sup>-1</sup>). The electrodeposition was conducted at 40 °C by means of a Chenhua CHI760b model Electrochemical Workstation (Shanghai), with a three-electrode cell consisting a saturated calomel electrode (SCE) as reference electrode, a 1.0 cm × 1.0 cm platinum plate as counter electrode and AAO/Ti/Si substrates (1 cm<sup>2</sup> in area) as the working electrode. The electrodeposition experiments were all carried out at a constant potential of 1.0 V vs. SCE to give a totally passed charge of 0.22 C for the same required amount of MnO<sub>2</sub>. After deposition, the nanowire arrays were first immersed in ethanol for 6 h which was regularly replaced every 2 h to remove the surfactant and other soluble materials. Thereafter, in order to remove the AAO film, all the prepared MnO<sub>2</sub> nanowire array electrodes were immersed in (0.1 mol L<sup>-1</sup>) NaOH for 15 min and then washed with water several times.

XRD data were collected using a Rigaku D/MAX 2400 diffractometer (Japan) with Cu Kα radiation (k = 1.54056 Å) operating at 40.0 kV, 60.0 mA. The surface

morphology of the  $\text{MnO}_2$  nanowire array was examined by FESEM (JEOL JSM-S4800). TEM images were performed on a JEOL JEM-1230 (Japan) equipped with a GATAN BioScan Camera 792 (U.S.A.).

Cyclic voltammetric and chronopotentiometric measurements were all performed in  $0.5 \text{ mol L}^{-1} \text{ Na}_2\text{SO}_4$  aqueous solution using CHI760B Electrochemical Workstation.

This work is supported by China Postdoctoral Science Foundation Funded Project and the National Natural Science Foundation of China (NNSFC20903050).

## References

- 1 C. L. Xu, S. J. Bao, L. B. Kong, H. Li, and H. L. Li, *J. Solid State Chem.* 2006, **179**, 1351.

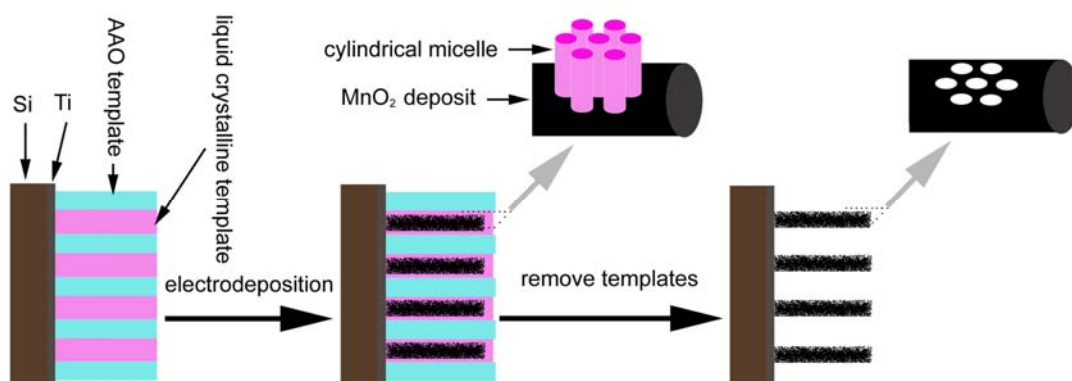

**Fig. S1.** Procedure of the electrodeposition of mesoporous  $\text{MnO}_2$  nanowire arrays from conjunct template of AAO and liquid crystal on the surface of AAO/Ti/Si substrates.

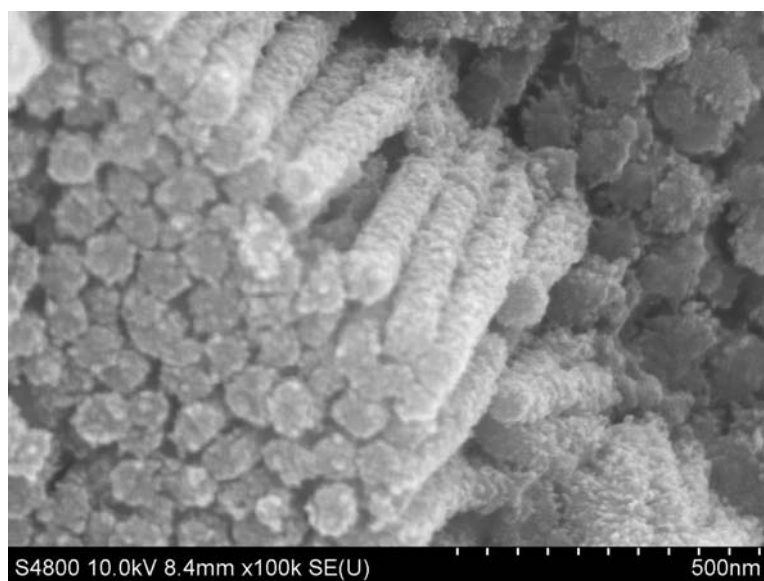

**Fig. S2.** High magnification FESEM image of the mesoporous MnO<sub>2</sub> nanowire arrays.

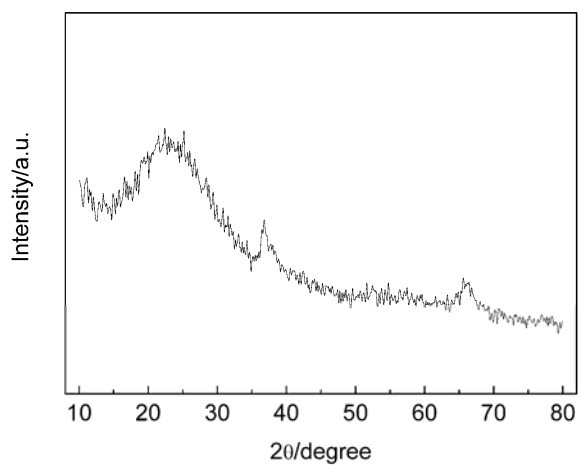

**Fig. S3.** XRD pattern of as-synthesized mesoporous MnO<sub>2</sub> nanowire arrays

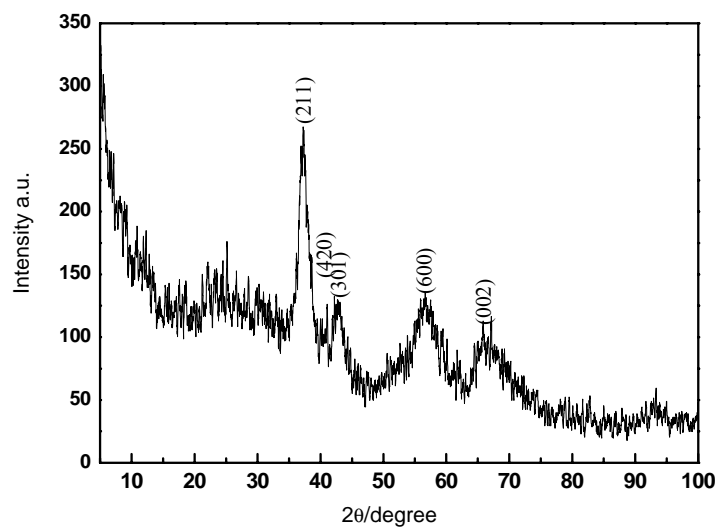

**Fig. S4.** XRD pattern of the mesoporous MnO<sub>2</sub> nanowire array heat-treated at 450°C
